# Supplementary material
Source: PubMed Central journal article supplement (PMC6583695)
Supplement: jamacardiol-3-1070-s001.pdf [file jamacardiol-3-1070-s001.pdf]

## Supplementary Online Content

Mao J, Redberg RF, Carroll JD, et al. Association between hospital surgical aortic valve replacement volume and transcatheter aortic valve replacement outcomes. *JAMA Cardiol*. Published online October 31, 2018.

doi:10.1001/jamacardio.2018.3562

**eTable 1.** Hospital Characteristics

**eTable 2.** Patient Characteristics (N/%) by Hospital SAVR and TAVR Volume

**eTable 3.** Unadjusted 30-day, 1-Year, and 2-Year Outcomes Among Medicare Beneficiaries Undergoing TAVR Procedures at Hospitals With Low and High SAVR Volume

**eTable 4.** Sensitivity Analysis of 30-Day, 1-Year, and 2-Year Outcomes Among Medicare Beneficiaries Undergoing Transfemoral TAVR Procedures at Hospitals with Low and High SAVR Volume

**eTable 5.** Sensitivity Analysis of 30-Day, 1-Year, and 2-Year Outcomes Among Medicare Beneficiaries Undergoing Transfemoral TAVR Procedures at Hospitals With Low and High SAVR/TAVR Volumes

**eTable 6.** Sensitivity Analysis of 30-Day, 1-Year, and 2-Year Outcomes Among Medicare Beneficiaries Undergoing Transfemoral TAVR Procedures at Hospitals, Using Different Volume Thresholds

This supplementary material has been provided by the authors to give readers additional information about their work.

| <b>eTable 1. Hospital Characteristics</b>          |            |
|----------------------------------------------------|------------|
| <b>All facilities</b>                              | N=438      |
| <b>Region (N/%)</b>                                |            |
| Northeast                                          | 86(19.6%)  |
| Midwest                                            | 102(23.3%) |
| South                                              | 161(36.8%) |
| West                                               | 89(20.3%)  |
| <b>Teaching facility (N/%)</b>                     | 167(38.1%) |
| <b>Total number of TAVR performed (Median/IQR)</b> | 83(34-182) |
| <b>TAVR/SAVR volume (N/%)</b>                      |            |
| <b>Low TAVR volume</b>                             |            |
| Low SAVR volume                                    | 280(63.9%) |
| High SAVR volume                                   | 62(14.2%)  |
| <b>High TAVR volume</b>                            |            |
| Low SAVR volume                                    | 51(11.6%)  |
| High SAVR volume                                   | 45(10.3%)  |

| <b>eTable 2. Patient Characteristics (N/%) by Hospital SAVR and TAVR Volume</b>                                                                                               |                                            |                                             |                                            |                                              |                |
|-------------------------------------------------------------------------------------------------------------------------------------------------------------------------------|--------------------------------------------|---------------------------------------------|--------------------------------------------|----------------------------------------------|----------------|
|                                                                                                                                                                               | <b>Hospital volume category</b>            |                                             |                                            |                                              | <b>P value</b> |
|                                                                                                                                                                               | <b>Low SAVR<br/>Low TAVR<br/>(N=21113)</b> | <b>High SAVR<br/>Low TAVR<br/>(N=10703)</b> | <b>Low SAVR<br/>High TAVR<br/>(N=8341)</b> | <b>High SAVR<br/>High TAVR<br/>(N=20381)</b> |                |
| <b>Age (Mean/SD)</b>                                                                                                                                                          | 82.2(8.0)                                  | 82.7(8.0)                                   | 81.8(8.1)                                  | 82.4(8.1)                                    | <.001          |
| <b>Female</b>                                                                                                                                                                 | 10210(48.4%)                               | 5226(48.8%)                                 | 3957(47.4%)                                | 9780(48.0%)                                  | .24            |
| <b>White race</b>                                                                                                                                                             | 19456(92.5%)                               | 10080(94.4%)                                | 7674(92.3%)                                | 18991(93.4%)                                 | <.001          |
| <b>Comorbidities (1 year)</b>                                                                                                                                                 |                                            |                                             |                                            |                                              |                |
| Coronary Artery Disease                                                                                                                                                       | 16732(79.3%)                               | 8398(78.5%)                                 | 6647(79.7%)                                | 16450(80.7%)                                 | <.001          |
| Hypertension                                                                                                                                                                  | 19418(92.0%)                               | 9813(91.7%)                                 | 7712(92.5%)                                | 18916(92.8%)                                 | <.001          |
| Chronic Heart Failure                                                                                                                                                         | 16609(78.7%)                               | 8399(78.5%)                                 | 6615(79.3%)                                | 17086(83.8%)                                 | <.001          |
| Diabetes                                                                                                                                                                      | 8539(40.4%)                                | 4274(39.9%)                                 | 3430(41.1%)                                | 8049(39.5%)                                  | .05            |
| Chronic Pulmonary Disease                                                                                                                                                     | 8268(39.2%)                                | 4257(39.8%)                                 | 3512(42.1%)                                | 8204(40.3%)                                  | <.001          |
| Obesity                                                                                                                                                                       | 4118(19.5%)                                | 1981(18.5%)                                 | 1620(19.4%)                                | 3915(19.2%)                                  | .19            |
| Cerebro-vascular Disease                                                                                                                                                      | 1720(8.2%)                                 | 896(8.4%)                                   | 674(8.1%)                                  | 1718(8.4%)                                   | .65            |
| Peripheral Artery Disease                                                                                                                                                     | 5846(27.7%)                                | 2870(26.8%)                                 | 2467(29.6%)                                | 6009(29.5%)                                  | <.001          |
| <b>Recent conditions (90 day)</b>                                                                                                                                             |                                            |                                             |                                            |                                              |                |
| Cardiovascular events*                                                                                                                                                        | 3365(15.9%)                                | 1702(15.9%)                                 | 1290(15.5%)                                | 3088(15.2%)                                  | .12            |
| Atrial Fibrillation/flutter                                                                                                                                                   | 8758(41.5%)                                | 4742(44.3%)                                 | 3504(42.0%)                                | 8811(43.2%)                                  | <.001          |
| Renal Failure                                                                                                                                                                 | 2008(9.5%)                                 | 1070(10.0%)                                 | 822(9.9%)                                  | 2132(10.5%)                                  | .01            |
| <b>Previous Valve Intervention</b>                                                                                                                                            | 2482(11.8%)                                | 1034(9.7%)                                  | 1061(12.7%)                                | 2902(14.2%)                                  | <.001          |
| <b>Previous CABG or Septal Defect Repair</b>                                                                                                                                  | 2557(12.1%)                                | 1311(12.3%)                                 | 967(11.6%)                                 | 2437(12.0%)                                  | .53            |
| <b>Previous PCI</b>                                                                                                                                                           | 4669(22.1%)                                | 2347(21.9%)                                 | 1919(23.0%)                                | 4542(22.3%)                                  | .30            |
| <b>Approach</b>                                                                                                                                                               |                                            |                                             |                                            |                                              | <.001          |
| Trans-femoral                                                                                                                                                                 | 17811(84.4%)                               | 9288(86.8%)                                 | 6993(83.4%)                                | 17869(87.7%)                                 |                |
| Trans-apical                                                                                                                                                                  | 3302(15.6%)                                | 1415(13.2%)                                 | 1348(16.6%)                                | 2512(12.3%)                                  |                |
| <b>Elective Admission</b>                                                                                                                                                     | 17405(82.4%)                               | 8707(81.4%)                                 | 6366(76.3%)                                | 14723(72.2%)                                 | <.001          |
| <b>Concurrent PCI</b>                                                                                                                                                         | 683(3.2%)                                  | 340(3.2%)                                   | 321(3.9%)                                  | 707(3.5%)                                    | .03            |
| <b>Teaching Facility</b>                                                                                                                                                      | 7309(34.6%)                                | 7078(66.1%)                                 | 6004(72.0%)                                | 16308(80.0%)                                 | <.001          |
| <b>Facility Region</b>                                                                                                                                                        |                                            |                                             |                                            |                                              | <.001          |
| Northeast                                                                                                                                                                     | 3235(15.3%)                                | 3644(34.1%)                                 | 1673(20.1%)                                | 7543(37.0%)                                  |                |
| Midwest                                                                                                                                                                       | 5292(25.1%)                                | 1910(17.9%)                                 | 1325(15.9%)                                | 5442(26.7%)                                  |                |
| South                                                                                                                                                                         | 8248(39.1%)                                | 3490(32.6%)                                 | 3273(39.2%)                                | 4655(22.8%)                                  |                |
| West                                                                                                                                                                          | 4338(20.6%)                                | 1659(15.5%)                                 | 2070(24.8%)                                | 2741(13.6%)                                  |                |
| <b>PCI Volume above Median</b>                                                                                                                                                | 6587(31.2%)                                | 7014(65.5%)                                 | 2890(34.7%)                                | 13812(67.8%)                                 | <.001          |
| *Recent cardiovascular conditions included acute myocardial infarction, carotid stenosis, and endocarditis.                                                                   |                                            |                                             |                                            |                                              |                |
| Abbreviations: TAVR=Transcatheter Aortic Valve Replacement, SAVR=Surgical Aortic Valve Replacement, CABG=Coronary Artery Bypass Graft, PCI=Percutaneous Coronary Intervention |                                            |                                             |                                            |                                              |                |

| <b>eTable 3. Unadjusted 30-day, 1-Year, and 2-Year Outcomes Among Medicare Beneficiaries Undergoing TAVR Procedures at Hospitals With Low and High SAVR Volume</b> |                                               |                                                    |                                          |
|--------------------------------------------------------------------------------------------------------------------------------------------------------------------|-----------------------------------------------|----------------------------------------------------|------------------------------------------|
|                                                                                                                                                                    | <b>Procedures performed in the first year</b> | <b>Procedures performed in the first two years</b> | <b>Procedures performed in all years</b> |
|                                                                                                                                                                    | <b>Events (N/%)</b>                           | <b>Events (N/%)</b>                                | <b>Events (N/%)</b>                      |
| <i>N patients</i>                                                                                                                                                  | 10962                                         | 24442                                              | 58337                                    |
| <b>30-day mortality</b>                                                                                                                                            |                                               |                                                    |                                          |
| Low SAVR/Low TAVR                                                                                                                                                  | 270(6.7%)                                     | 754(6.4%)                                          | 1153(5.7%)                               |
| High SAVR/Low TAVR                                                                                                                                                 | 99(7.2%)                                      | 578(6.2%)                                          | 562(5.4%)                                |
| Low SAVR/High TAVR                                                                                                                                                 | 180(7.2%)                                     | 112(5.1%)                                          | 396(4.9%)                                |
| High SAVR/High TAVR                                                                                                                                                | 195(6.4%)                                     | 57(5.0%)                                           | 885(4.5%)                                |
| <b>30-day mortality/stroke</b>                                                                                                                                     |                                               |                                                    |                                          |
| Low SAVR/Low TAVR                                                                                                                                                  | 384(9.6%)                                     | 1040(8.9%)                                         | 1644(8.1%)                               |
| High SAVR/Low TAVR                                                                                                                                                 | 129(9.4%)                                     | 824(8.8%)                                          | 826(8.0%)                                |
| Low SAVR/High TAVR                                                                                                                                                 | 242(9.6%)                                     | 155(7.0%)                                          | 559(7.0%)                                |
| High SAVR/High TAVR                                                                                                                                                | 284(9.3%)                                     | 81(7.1%)                                           | 1380(7.0%)                               |
| <b>30-day readmission</b>                                                                                                                                          |                                               |                                                    |                                          |
| Low SAVR/Low TAVR                                                                                                                                                  | 1017(25.4%)                                   | 2923(24.9%)                                        | 4766(23.6%)                              |
| High SAVR/Low TAVR                                                                                                                                                 | 359(26.1%)                                    | 2370(25.3%)                                        | 2409(23.3%)                              |
| Low SAVR/High TAVR                                                                                                                                                 | 673(26.8%)                                    | 547(24.8%)                                         | 1756(21.9%)                              |
| High SAVR/High TAVR                                                                                                                                                | 832(27.2%)                                    | 298(26.0%)                                         | 4156(21.1%)                              |
|                                                                                                                                                                    | <b>Estimated risk</b>                         | <b>Estimated risk</b>                              | <b>Estimated risk</b>                    |
| <i>N patients</i>                                                                                                                                                  | 11098                                         | 24751                                              | 60538                                    |
| <b>1-year mortality</b>                                                                                                                                            |                                               |                                                    |                                          |
| Low SAVR/Low TAVR                                                                                                                                                  | 23.1%                                         | 22.4%                                              | 20.6%                                    |
| High SAVR/Low TAVR                                                                                                                                                 | 25.0%                                         | 22.4%                                              | 21.0%                                    |
| Low SAVR/High TAVR                                                                                                                                                 | 23.1%                                         | 18.9%                                              | 19.6%                                    |
| High SAVR/High TAVR                                                                                                                                                | 24.0%                                         | 19.1%                                              | 18.4%                                    |
| <b>2-year mortality</b>                                                                                                                                            |                                               |                                                    |                                          |
| Low SAVR/Low TAVR                                                                                                                                                  | 34.7%                                         | 34.5%                                              | 32.5%                                    |
| High SAVR/Low TAVR                                                                                                                                                 | 36.2%                                         | 33.5%                                              | 32.7%                                    |
| Low SAVR/High TAVR                                                                                                                                                 | 34.8%                                         | 30.1%                                              | 31.6%                                    |
| High SAVR/High TAVR                                                                                                                                                | 35.6%                                         | 31.9%                                              | 30.0%                                    |

**eTable 4.** Sensitivity Analysis of 30-Day, 1-Year, and 2-Year Outcomes Among Medicare Beneficiaries Undergoing Transfemoral TAVR Procedures at Hospitals with Low and High SAVR Volume

|                                | Procedures performed in the first year |                             | Procedures performed in the first two years |                             | Procedures performed in all years |                             |
|--------------------------------|----------------------------------------|-----------------------------|---------------------------------------------|-----------------------------|-----------------------------------|-----------------------------|
|                                | Events (N/%)                           | Adjusted OR (95% CI)        | Events (N/%)                                | Adjusted OR (95% CI)        | Events (N/%)                      | Adjusted OR (95% CI)        |
| <i>N patients</i>              | 9498                                   |                             | 19781                                       |                             | 49852                             |                             |
| <b>30-day mortality</b>        |                                        |                             |                                             |                             |                                   |                             |
| Low SAVR volume                | 369(6.4%)                              | Ref                         | 657(5.7%)                                   | Ref                         | 1186(5.0%)                        | Ref                         |
| High SAVR volume               | 233(6.2%)                              | 0.98(0.78-1.22)             | 460(5.5%)                                   | 0.95(0.80-1.12)             | 1143(4.4%)                        | 0.98(0.78-1.00)             |
| <b>30-day mortality/stroke</b> |                                        |                             |                                             |                             |                                   |                             |
| Low SAVR volume                | 511(8.9%)                              | Ref                         | 911(8.0%)                                   | Ref                         | 1706(7.2%)                        | Ref                         |
| High SAVR volume               | 344(9.1%)                              | 1.03(0.86-1.24)             | 678(8.1%)                                   | 1.01(0.88-1.15)             | 1803(6.9%)                        | 0.96(0.87-1.05)             |
| <b>30-day readmission</b>      |                                        |                             |                                             |                             |                                   |                             |
| Low SAVR volume                | 1412(24.6%)                            | Ref                         | 2692(23.5%)                                 | Ref                         | 5152(21.8%)                       | Ref                         |
| High SAVR volume               | 975(25.9%)                             | 1.04(0.92-1.19)             | 1959(23.5%)                                 | 0.99(0.89-1.10)             | 5387(20.6%)                       | 0.96(0.89-1.04)             |
|                                | <b>Estimated risk</b>                  | <b>Adjusted HR (95% CI)</b> | <b>Estimated risk</b>                       | <b>Adjusted HR (95% CI)</b> | <b>Estimated risk</b>             | <b>Adjusted HR (95% CI)</b> |
| <i>N patients</i>              | 9633                                   |                             | 20087                                       |                             | 51961                             |                             |
| <b>1-year mortality</b>        |                                        |                             |                                             |                             |                                   |                             |
| Low SAVR volume                | 22.4%                                  | Ref                         | 21.2%                                       | Ref                         | 19.5%                             | Ref                         |
| High SAVR volume               | 24.0%                                  | 1.00(0.87-1.14)             | 21.4%                                       | 0.97(0.89-1.07)             | 18.6%                             | 0.95(0.89-1.02)             |
| <b>2-year mortality</b>        |                                        |                             |                                             |                             |                                   |                             |
| Low SAVR volume                | 34.4%                                  | Ref                         | 33.4%                                       | Ref                         | 31.7%                             | Ref                         |
| High SAVR volume               | 35.7%                                  | 1.00(0.90-1.11)             | 32.8%                                       | 0.95(0.88-1.02)             | 30.2%                             | 0.95(0.89-1.02)             |

Analyses for 30-day outcomes excluded patients undergoing procedure in December 2015. Time-to-event analyses were used to examine 1-year and 2-year mortality.

| <b>eTable 5. Sensitivity Analysis of 30-Day, 1-Year, and 2-Year Outcomes Among Medicare Beneficiaries Undergoing Transfemoral TAVR Procedures at Hospitals With Low and High SAVR/TAVR Volumes</b> |                                               |                             |                                                    |                             |                                          |                             |
|----------------------------------------------------------------------------------------------------------------------------------------------------------------------------------------------------|-----------------------------------------------|-----------------------------|----------------------------------------------------|-----------------------------|------------------------------------------|-----------------------------|
|                                                                                                                                                                                                    | <b>Procedures performed in the first year</b> |                             | <b>Procedures performed in the first two years</b> |                             | <b>Procedures performed in all years</b> |                             |
|                                                                                                                                                                                                    | <b>Events (N/%)</b>                           | <b>Adjusted OR (95% CI)</b> | <b>Events (N/%)</b>                                | <b>Adjusted OR (95% CI)</b> | <b>Events (N/%)</b>                      | <b>Adjusted OR (95% CI)</b> |
| <i>N patients</i>                                                                                                                                                                                  | 9498                                          |                             | 19781                                              |                             | 49852                                    |                             |
| <b>30-day mortality</b>                                                                                                                                                                            |                                               |                             |                                                    |                             |                                          |                             |
| Low SAVR/<br>Low TAVR                                                                                                                                                                              | 225(6.5%)                                     | Ref                         | 565(5.9%)                                          | Ref                         | 874(5.2%)                                | Ref                         |
| High SAVR/<br>Low TAVR                                                                                                                                                                             | 71(6.8%)                                      | 1.04<br>(0.76-1.42)         | 425(5.7%)                                          | 0.99<br>(0.83-1.18)         | 508(4.9%)                                | 0.95<br>(0.82-1.10)         |
| Low SAVR/<br>High TAVR                                                                                                                                                                             | 144(6.4%)                                     | 0.98<br>(0.77-1.26)         | 92(4.8%)                                           | 0.89<br>(0.69-1.15)         | 312(4.7%)                                | 0.89<br>(0.75-1.06)         |
| High SAVR/<br>High TAVR                                                                                                                                                                            | 162(5.9%)                                     | 0.93<br>(0.69-1.24)         | 35(4.2%)                                           | 0.66<br>(0.44-0.98)         | 635(4.0%)                                | 0.72<br>(0.61-0.85)         |
| <b>30-day mortality/stroke</b>                                                                                                                                                                     |                                               |                             |                                                    |                             |                                          |                             |
| Low SAVR/<br>Low TAVR                                                                                                                                                                              | 326(9.4%)                                     | Ref                         | 791(8.3%)                                          | Ref                         | 1261(7.4%)                               | Ref                         |
| High SAVR/<br>Low TAVR                                                                                                                                                                             | 99(9.5%)                                      | 1.01<br>(0.78-1.31)         | 627(8.4%)                                          | 1.04<br>(0.90-1.19)         | 780(7.6%)                                | 1.00<br>(0.89-1.12)         |
| Low SAVR/<br>High TAVR                                                                                                                                                                             | 185(8.2%)                                     | 0.87<br>(0.71-1.07)         | 120(6.3%)                                          | 0.84<br>(0.68-1.04)         | 445(6.7%)                                | 0.86<br>(0.75-0.99)         |
| High SAVR/<br>High TAVR                                                                                                                                                                            | 245(9.0%)                                     | 0.95<br>(0.75-1.20)         | 51(6.1%)                                           | 0.70<br>(0.51-0.96)         | 1023(6.4%)                               | 0.79<br>(0.70-0.91)         |
| <b>30-day readmission</b>                                                                                                                                                                          |                                               |                             |                                                    |                             |                                          |                             |
| Low SAVR/<br>Low TAVR                                                                                                                                                                              | 857(24.7%)                                    | Ref                         | 2262(23.7%)                                        | Ref                         | 3775(22.3%)                              | Ref                         |
| High SAVR/<br>Low TAVR                                                                                                                                                                             | 268(25.8%)                                    | 0.99<br>(0.82-1.19)         | 1753(23.4%)                                        | 0.98<br>(0.87-1.10)         | 2247(21.9%)                              | 0.98<br>(0.90-1.07)         |
| Low SAVR/<br>High TAVR                                                                                                                                                                             | 555(24.5%)                                    | 0.98<br>(0.85-1.12)         | 430(22.5%)                                         | 0.97<br>(0.83-1.13)         | 1377(20.6%)                              | 0.91<br>(0.82-1.02)         |
| High SAVR/<br>High TAVR                                                                                                                                                                            | 707(25.9%)                                    | 1.06<br>(0.90-1.25)         | 206(24.8%)                                         | 1.03<br>(0.81-1.30)         | 3140(19.7%)                              | 0.87<br>(0.78-0.97)         |

**eTable 5 (continued).** Sensitivity Analysis of 30-Day, 1-Year, and 2-Year Outcomes Among Medicare Beneficiaries Undergoing Transfemoral TAVR Procedures at Hospitals With Low and High SAVR/TAVR Volumes

|                                                                                                                                                                | <b>Estimated risk</b> | <b>Adjusted HR (95% CI)</b> |  | <b>Estimated risk</b> | <b>Adjusted HR (95% CI)</b> |  | <b>Estimated risk</b> | <b>Adjusted HR (95% CI)</b> |
|----------------------------------------------------------------------------------------------------------------------------------------------------------------|-----------------------|-----------------------------|--|-----------------------|-----------------------------|--|-----------------------|-----------------------------|
| <i>N patients</i>                                                                                                                                              | 9633                  |                             |  | 20087                 |                             |  | 51961                 |                             |
| <b>1-year mortality</b>                                                                                                                                        |                       |                             |  |                       |                             |  |                       |                             |
| Low SAVR/<br>Low TAVR                                                                                                                                          | 23.2%                 | Ref                         |  | 21.7%                 | Ref                         |  | 19.9%                 | Ref                         |
| High SAVR/<br>Low TAVR                                                                                                                                         | 24.9%                 | 0.96<br>(0.82-1.14)         |  | 21.7%                 | 0.99<br>(0.89-1.10)         |  | 19.9%                 | 1.00<br>(0.93-1.08)         |
| Low SAVR/<br>High TAVR                                                                                                                                         | 21.0%                 | 0.90<br>(0.78-1.03)         |  | 17.8%                 | 0.87<br>(0.76-1.00)         |  | 18.6%                 | 0.93<br>(0.84-1.03)         |
| High SAVR/<br>High TAVR                                                                                                                                        | 23.7%                 | 0.94<br>(0.80-1.12)         |  | 18.4%                 | 0.77<br>(0.66-0.91)         |  | 17.7%                 | 0.84<br>(0.76-0.93)         |
| <b>2-year mortality</b>                                                                                                                                        |                       |                             |  |                       |                             |  |                       |                             |
| Low SAVR/<br>Low TAVR                                                                                                                                          | 35.1%                 | Ref                         |  | 33.9%                 | Ref                         |  | 32.2%                 | Ref                         |
| High SAVR/<br>Low TAVR                                                                                                                                         | 36.4%                 | 0.97<br>(0.84-1.11)         |  | 33.0%                 | 0.95<br>(0.87-1.04)         |  | 31.9%                 | 1.00<br>(0.94-1.07)         |
| Low SAVR/<br>High TAVR                                                                                                                                         | 33.3%                 | 0.92<br>(0.82-1.04)         |  | 30.4%                 | 0.88<br>(0.80-0.98)         |  | 30.7%                 | 0.94<br>(0.86-1.03)         |
| High SAVR/<br>High TAVR                                                                                                                                        | 35.4%                 | 0.96<br>(0.84-1.09)         |  | 31.7%                 | 0.83<br>(0.75-0.92)         |  | 29.1%                 | 0.85<br>(0.78-0.94)         |
| Analyses for 30-day outcomes excluded patients undergoing procedure in December 2015. Time-to-event analyses were used to examine 1-year and 2-year mortality. |                       |                             |  |                       |                             |  |                       |                             |

**eTable 6.** Sensitivity Analysis of 30-Day, 1-Year, and 2-Year Outcomes Among Medicare Beneficiaries Undergoing TAVR Procedures at Hospitals, Using Different Volume Thresholds

|                                                                                          | By SAVR or TAVR volume       |                              | By combined SAVR/TAVR volume |                       |                       |                       |                       |
|------------------------------------------------------------------------------------------|------------------------------|------------------------------|------------------------------|-----------------------|-----------------------|-----------------------|-----------------------|
|                                                                                          | High SAVR<br>vs.<br>Low SAVR | High TAVR<br>vs.<br>Low TAVR | HS/LT<br>vs.<br>LS/LT        | LS/HT<br>vs.<br>LS/LT | HS/HT<br>vs.<br>LS/LT | HS/HT<br>vs.<br>LS/HT | HS/HT<br>vs.<br>HS/LT |
| <b>Main analysis</b>                                                                     |                              |                              |                              |                       |                       |                       |                       |
| 30-day mortality                                                                         | 0.93(0.83-1.04)              | 0.83(0.74-0.93)              | 0.94(0.82-1.08)              | 0.85(0.72-0.99)       | 0.77(0.66-0.89)       | 0.91(0.76-1.08)       | 0.81(0.69-0.95)       |
| 30-day mortality/stroke                                                                  | 0.98(0.89-1.07)              | 0.84(0.77-0.93)              | 0.97(0.87-1.08)              | 0.83(0.73-0.95)       | 0.83(0.73-0.94)       | 1.00(0.86-1.15)       | 0.86(0.75-0.97)       |
| 30-day readmission                                                                       | 0.98(0.91-1.06)              | 0.91(0.84-0.98)              | 1.00(0.91-1.10)              | 0.93(0.83-1.03)       | 0.88(0.79-0.98)       | 0.95(0.84-1.08)       | 0.89(0.79-0.99)       |
| 1-year mortality                                                                         | 0.97(0.91-1.04)              | 0.87(0.81-0.94)              | 1.01(0.94-1.09)              | 0.92(0.84-1.00)       | 0.85(0.77-0.93)       | 0.92(0.83-1.02)       | 0.84(0.76-0.92)       |
| 2-year mortality                                                                         | 0.97(0.92-1.03)              | 0.89(0.84-0.95)              | 1.01(0.94-1.07)              | 0.93(0.86-1.01)       | 0.86(0.79-0.94)       | 0.93(0.84-1.01)       | 0.86(0.79-0.93)       |
| <b>High SAVR ≥ 97/y<br/>High TAVR ≥ 50/y or<br/>100/2y<br/>for majority of<br/>years</b> |                              |                              |                              |                       |                       |                       |                       |
| 30-day mortality                                                                         | 0.94(0.83-1.05)              | 0.86(0.75-0.98)              | 0.97(0.84-1.11)              | 0.90(0.75-1.07)       | 0.80(0.69-0.93)       | 0.89(0.74-1.07)       | 0.83(0.70-0.97)       |
| 30-day mortality/stroke                                                                  | 0.98(0.89-1.08)              | 0.88(0.79-0.98)              | 0.95(0.85-1.07)              | 0.85(0.73-0.98)       | 0.87(0.77-0.98)       | 1.02(0.88-1.19)       | 0.91(0.80-1.04)       |
| 30-day readmission                                                                       | 0.99(0.91-1.08)              | 0.91(0.83-0.99)              | 1.00(0.91-1.11)              | 0.92(0.81-1.05)       | 0.89(0.81-0.99)       | 0.97(0.85-1.11)       | 0.89(0.80-1.00)       |
| 1-year mortality                                                                         | 0.97(0.91-1.04)              | 0.92(0.85-0.99)              | 1.02(0.94-1.10)              | 0.97(0.88-1.06)       | 0.89(0.81-0.98)       | 0.93(0.83-1.03)       | 0.88(0.80-0.98)       |
| 2-year mortality                                                                         | 0.97(0.91-1.03)              | 0.93(0.87-0.97)              | 1.00(0.93-1.07)              | 0.96(0.88-1.04)       | 0.90(0.83-0.97)       | 0.94(0.86-1.03)       | 0.90(0.82-0.98)       |
| <b>High SAVR ≥ 84/y<br/>High TAVR ≥ Median<br/>for majority of<br/>years</b>             |                              |                              |                              |                       |                       |                       |                       |
| 30-day mortality                                                                         | 0.91(0.81-1.01)              | 0.83(0.74-0.93)              | 0.92(0.81-1.04)              | 0.86(0.72-1.02)       | 0.75(0.64-0.87)       | 0.87(0.72-1.05)       | 0.81(0.70-0.93)       |
| 30-day mortality/stroke                                                                  | 0.95(0.86-1.03)              | 0.85(0.77-0.93)              | 0.94(0.85-1.05)              | 0.84(0.73-0.98)       | 0.80(0.71-0.90)       | 0.95(0.81-1.10)       | 0.85(0.75-0.95)       |
| 30-day readmission                                                                       | 0.97(0.90-1.05)              | 0.91(0.84-0.98)              | 0.99(0.91-1.08)              | 0.94(0.83-1.06)       | 0.88(0.79-0.97)       | 0.93(0.82-1.07)       | 0.89(0.80-0.98)       |
| 1-year mortality                                                                         | 0.94(0.89-1.00)              | 0.88(0.82-0.94)              | 0.98(0.92-1.05)              | 0.94(0.87-1.02)       | 0.83(0.75-0.91)       | 0.88(0.81-0.96)       | 0.84(0.77-0.92)       |
| 2-year mortality                                                                         | 0.95(0.90-1.00)              | 0.89(0.84-0.95)              | 0.99(0.93-1.05)              | 0.96(0.89-1.03)       | 0.85(0.78-0.92)       | 0.88(0.82-0.96)       | 0.86(0.80-0.92)       |
| <b>High SAVR ≥ 84/y<br/>High TAVR ≥ 50/y or<br/>100/2y<br/>for majority of<br/>years</b> |                              |                              |                              |                       |                       |                       |                       |
| 30-day mortality                                                                         | 0.91(0.82-1.02)              | 0.86(0.76-0.98)              | 0.94(0.83-1.08)              | 0.93(0.76-1.15)       | 0.79(0.68-0.91)       | 0.84(0.69-1.03)       | 0.83(0.72-0.96)       |
| 30-day mortality/stroke                                                                  | 0.95(0.86-1.04)              | 0.89(0.80-0.99)              | 0.95(0.85-1.06)              | 0.88(0.74-1.05)       | 0.85(0.75-0.96)       | 0.96(0.81-1.13)       | 0.89(0.79-1.01)       |
| 30-day readmission                                                                       | 0.98(0.91-1.06)              | 0.91(0.83-0.99)              | 0.99(0.90-1.08)              | 0.92(0.79-1.07)       | 0.89(0.80-0.99)       | 0.97(0.83-1.13)       | 0.90(0.81-1.00)       |



|                                                                                                                                                                                                  |                 |                 |  |                 |                 |                 |                 |                 |
|--------------------------------------------------------------------------------------------------------------------------------------------------------------------------------------------------|-----------------|-----------------|--|-----------------|-----------------|-----------------|-----------------|-----------------|
| 1-year mortality                                                                                                                                                                                 | 0.94(0.89-1.00) | 0.93(0.86-1.00) |  | 0.99(0.92-1.06) | 1.00(0.91-1.10) | 0.88(0.80-0.96) | 0.88(0.80-0.97) | 0.89(0.81-0.98) |
| 2-year mortality                                                                                                                                                                                 | 0.95(0.90-1.00) | 0.93(0.87-0.99) |  | 0.99(0.93-1.05) | 0.99(0.92-1.08) | 0.89(0.82-0.96) | 0.89(0.82-0.97) | 0.90(0.83-0.97) |
| <b>eTable 6 (continued).</b> Sensitivity Analysis of 30-Day, 1-Year, and 2-Year Outcomes Among Medicare Beneficiaries Undergoing TAVR Procedures at Hospitals, Using Different Volume Thresholds |                 |                 |  |                 |                 |                 |                 |                 |
| <b>High SAVR <math>\geq</math> 97/y<br/>High TAVR <math>\geq</math> 3<sup>rd</sup> tertile<br/>for majority of<br/>years</b>                                                                     |                 |                 |  |                 |                 |                 |                 |                 |
| 30-day mortality                                                                                                                                                                                 | 0.90(0.81-1.01) | 0.89(0.77-1.02) |  | 0.91(0.81-1.03) | 0.91(0.73-1.13) | 0.80(0.66-0.96) | 0.88(0.68-1.13) | 0.87(0.73-1.04) |
| 30-day mortality/stroke                                                                                                                                                                          | 0.95(0.87-1.04) | 0.91(0.81-1.02) |  | 0.95(0.86-1.05) | 0.88(0.74-1.06) | 0.87(0.74-1.02) | 0.98(0.80-1.21) | 0.92(0.80-1.06) |
| 30-day readmission                                                                                                                                                                               | 0.97(0.90-1.05) | 0.95(0.86-1.05) |  | 0.98(0.90-1.06) | 0.98(0.84-1.15) | 0.91(0.79-1.04) | 0.93(0.77-1.12) | 0.93(0.82-1.06) |
| 1-year mortality                                                                                                                                                                                 | 0.95(0.89-1.02) | 0.98(0.90-1.07) |  | 0.96(0.89-1.04) | 1.01(0.90-1.13) | 0.94(0.84-1.05) | 0.93(0.81-1.06) | 0.97(0.87-1.08) |
| 2-year mortality                                                                                                                                                                                 | 0.95(0.90-1.01) | 0.98(0.91-1.06) |  | 0.95(0.89-1.02) | 0.99(0.89-1.09) | 0.93(0.85-1.03) | 0.95(0.84-1.07) | 0.98(0.89-1.07) |
| <b>High SAVR <math>\geq</math> 97/y<br/>High TAVR <math>\geq</math> 1<sup>st</sup> tertile<br/>for majority of<br/>years</b>                                                                     |                 |                 |  |                 |                 |                 |                 |                 |
| 30-day mortality                                                                                                                                                                                 | 0.92(0.82-1.03) | 0.93(0.83-1.04) |  | 1.03(0.88-1.21) | 1.01(0.88-1.15) | 0.84(0.73-0.97) | 0.83(0.72-0.97) | 0.81(0.69-0.96) |
| 30-day mortality/stroke                                                                                                                                                                          | 0.97(0.88-1.06) | 0.94(0.86-1.03) |  | 1.01(0.88-1.15) | 0.97(0.86-1.08) | 0.90(0.80-1.01) | 0.93(0.82-1.06) | 0.89(0.78-1.03) |
| 30-day readmission                                                                                                                                                                               | 0.98(0.91-1.07) | 0.93(0.86-1.00) |  | 1.00(0.89-1.11) | 0.94(0.85-1.02) | 0.91(0.82-1.00) | 0.97(0.87-1.08) | 0.91(0.81-1.03) |
| 1-year mortality                                                                                                                                                                                 | 0.97(0.91-1.04) | 0.92(0.86-0.98) |  | 1.06(0.97-1.16) | 0.97(0.90-1.05) | 0.89(0.82-0.98) | 0.92(0.84-1.00) | 0.84(0.76-0.93) |
| 2-year mortality                                                                                                                                                                                 | 0.97(0.92-1.03) | 0.92(0.87-0.97) |  | 1.04(0.96-1.12) | 0.96(0.90-1.03) | 0.90(0.83-0.97) | 0.93(0.86-1.00) | 0.86(0.79-0.94) |
| Analyses for 30-day outcomes excluded patients undergoing procedure in December 2015. Time-to-event analyses were used to examine 1-year and 2-year mortality.                                   |                 |                 |  |                 |                 |                 |                 |                 |

Analyses included data from all years.
